# Supplementary material
Source: PubMed Central journal article supplement (PMC3138154)
Supplement: NIHMS300742-supplement-3_si_003.pdf [file NIHMS300742-supplement-3_si_003.pdf]

# Supporting Information

## Coordination Driven Self-Assembly and Anticancer Activity of Molecular Rectangles Containing Octahedral Ruthenium Metal Centers

*Vaishali Vajpayee,<sup>†</sup> Young Ho Song,<sup>†</sup> Yoon Jung Yang,<sup>‡</sup> Se Chan Kang,<sup>\*‡</sup> Hyunuk Kim,<sup>±</sup> In Su  
Kim,<sup>†</sup> Ming Wang,<sup>ζ</sup> Peter J. Stang,<sup>\*ζ</sup> and Ki-Whan Chi<sup>\*†</sup>*

<sup>†</sup> Department of Chemistry, University of Ulsan, Ulsan 680-749, Republic of Korea.

<sup>‡</sup> Department of Natural Medicine Resources, University of Semyung, Jecheon 390-711,  
Republic of Korea.

<sup>±</sup> Department of Chemistry, POSTECH, Pohang 690-784, Republic of Korea.

<sup>ζ</sup> Department of Chemistry, University of Utah, Salt Lake City, Utah 84112-0850, U.S.A.

\*E-mail: kwchi@ulsan.ac.kr, sckang@semyung.ac.kr, stang@chem.utah.edu

## Table of Contents

|                                                                                                 |     |
|-------------------------------------------------------------------------------------------------|-----|
| 1. <sup>1</sup> H-NMR spectra of the metalla-rectangles <b>1</b> , <b>2</b> and <b>3</b> .....  | 3-4 |
| 2. <sup>13</sup> C-NMR spectra of the metalla-rectangles <b>1</b> , <b>2</b> and <b>3</b> ..... | 4-5 |
| 3. HR-ESI-MS spectra of the metalla-rectangles <b>1</b> , <b>2</b> and <b>3</b> .....           | 6   |
| 4. Crystal data and structure refinement for <b>2</b> and <b>3</b> .....                        | 7   |
| 5. Numbered Crystal Diagram for the metalla-rectangles <b>2</b> and <b>3</b> .....              | 8   |
| 6. Important bond lengths and bond angles of the metalla-rectangles <b>2</b> and <b>3</b> ..... | 8   |
| 7. Hydrogen bonds for <b>2</b> .....                                                            | 9   |

Figure 1.  $^1\text{H}$  NMR spectra of the metalla-rectangles **1** (a), **2** (b) and **3** (c).

(a)

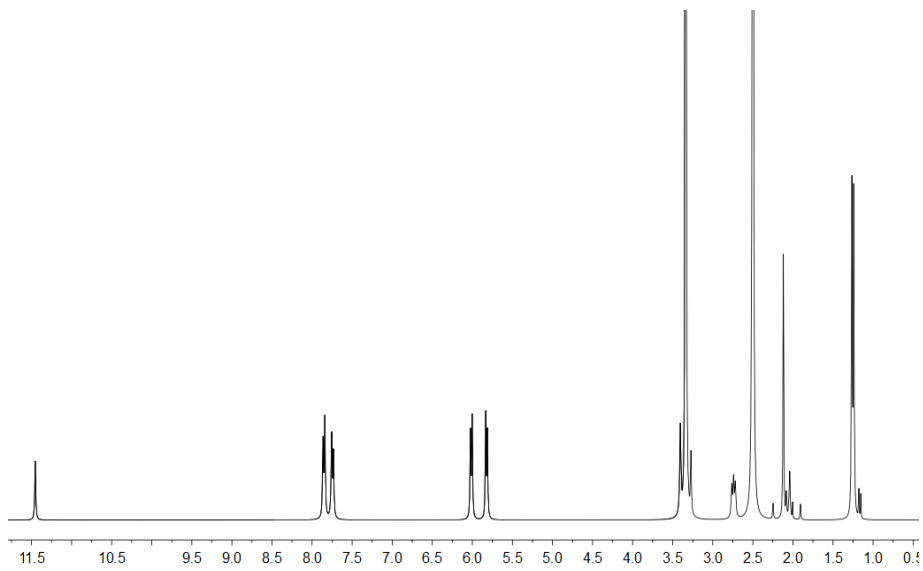

(b)

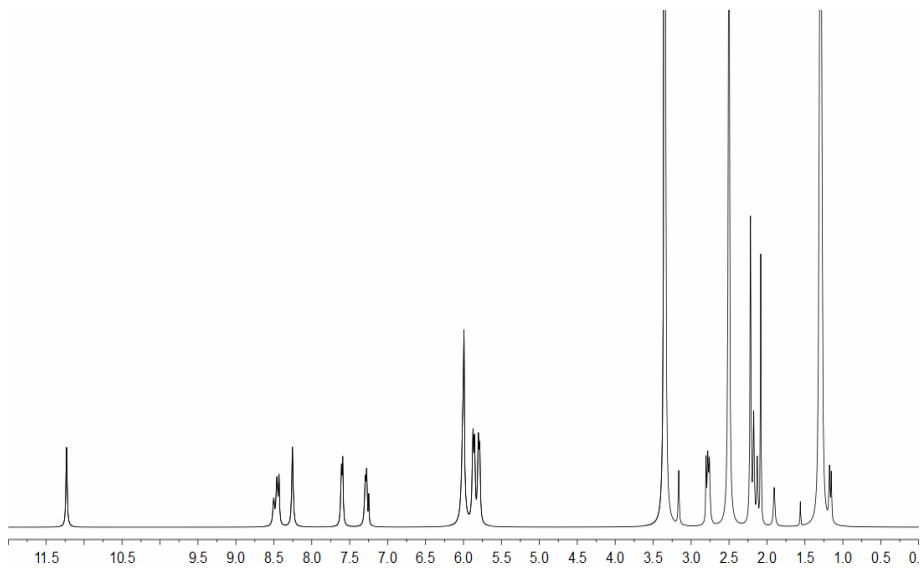

(c)

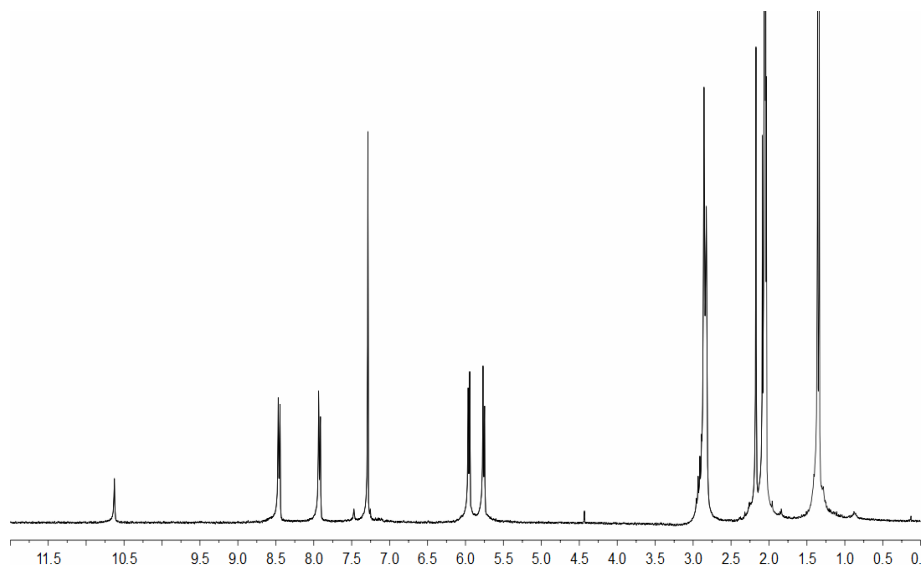

Figure 2.  $^{13}\text{C}$  NMR spectra of the metalla-rectangles **1** (a), **2** (b) and **3** (c).

(a)

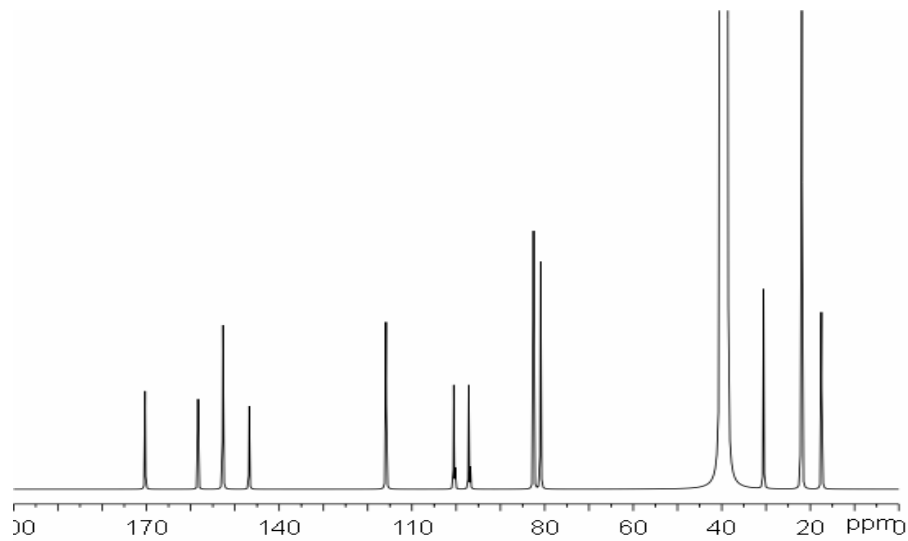

(b)

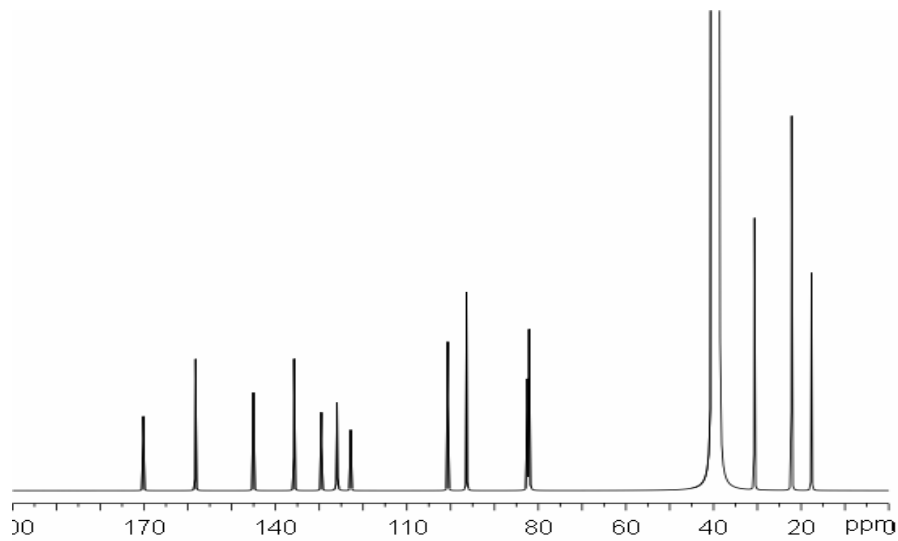

(c)

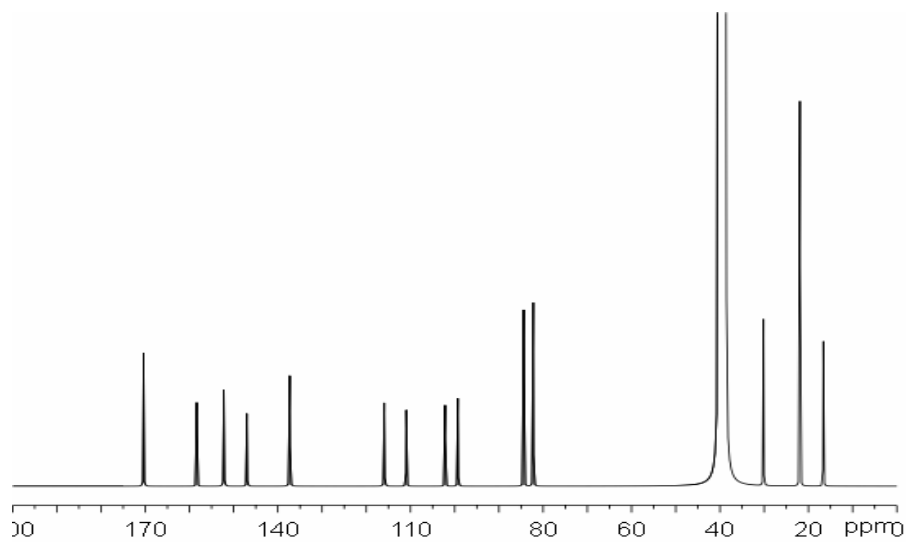

Figure 3. Calculated and experimental ESI-MS spectra of the metalla-rectangles **1**(a), **2** (b) and **3** (c).

(a)

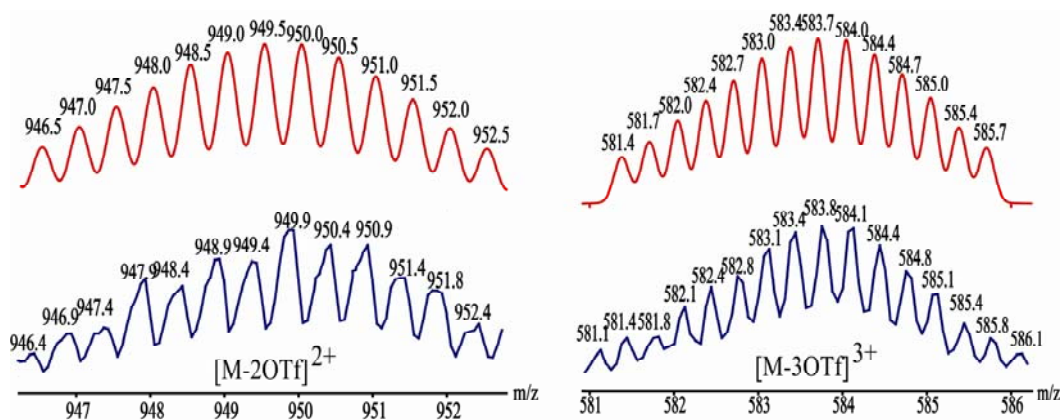

(b)

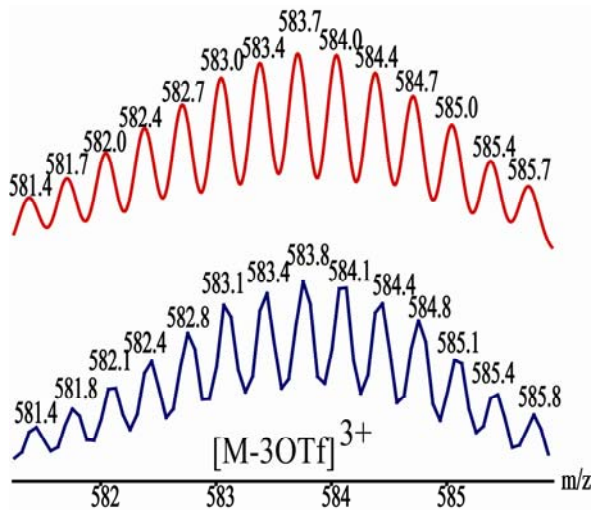

(c)

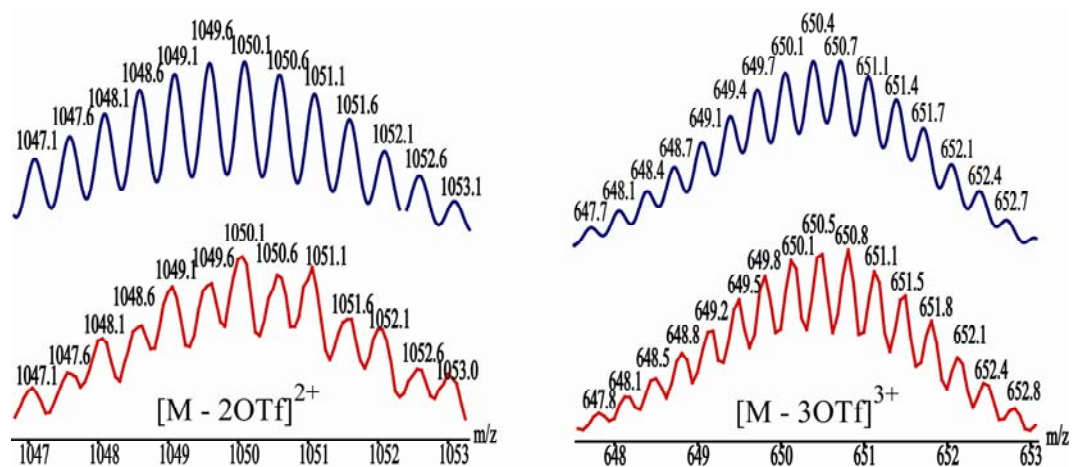

Table S1. Crystal data and structure refinement for **1** and **2**.

|                                                                                                          | <b>1</b>                                                                                                               | <b>2</b>                                                                                                      |
|----------------------------------------------------------------------------------------------------------|------------------------------------------------------------------------------------------------------------------------|---------------------------------------------------------------------------------------------------------------|
| Formula                                                                                                  | C <sub>76.12</sub> H <sub>86.80</sub> F <sub>12</sub> N <sub>9</sub> O <sub>26.78</sub> S <sub>4</sub> Ru <sub>4</sub> | C <sub>73</sub> H <sub>79</sub> F <sub>12</sub> N <sub>9</sub> O <sub>26</sub> S <sub>4</sub> Ru <sub>4</sub> |
| Fw                                                                                                       | 2316.79                                                                                                                | 2258.97                                                                                                       |
| T, K                                                                                                     | 100(2) K                                                                                                               | 100(2)                                                                                                        |
| $\lambda$ , Å                                                                                            | 0.900000                                                                                                               | 0.900000                                                                                                      |
| Crystal syst                                                                                             | Monoclinic                                                                                                             | Triclinic                                                                                                     |
| Space group                                                                                              | <i>P</i> 2 <sub>1</sub> / <i>n</i>                                                                                     | <i>P</i> -1                                                                                                   |
| <i>a</i> , Å                                                                                             | 13.827(3)                                                                                                              | 11.336(2)                                                                                                     |
| <i>b</i> , Å                                                                                             | 27.498(6)                                                                                                              | 17.650(4)                                                                                                     |
| <i>c</i> , Å                                                                                             | 24.766(5)                                                                                                              | 24.465(5)                                                                                                     |
| $\alpha$ , deg                                                                                           | 90                                                                                                                     | 81.32(3)                                                                                                      |
| $\beta$ , deg                                                                                            | 98.79(3)                                                                                                               | 83.65(3)                                                                                                      |
| $\gamma$ , deg                                                                                           | 90                                                                                                                     | 76.40(3)                                                                                                      |
| Volume, Å <sup>3</sup>                                                                                   | 9306(3)                                                                                                                | 4688.9(16)                                                                                                    |
| <i>Z</i>                                                                                                 | 4                                                                                                                      | 2                                                                                                             |
| Density, g/cm <sup>3</sup>                                                                               | 1.654                                                                                                                  | 1.600                                                                                                         |
| $\mu$ , mm <sup>-1</sup>                                                                                 | 1.550                                                                                                                  | 1.533                                                                                                         |
| F(000)                                                                                                   | 4675                                                                                                                   | 2272                                                                                                          |
| Index ranges                                                                                             | 0 ≤ <i>h</i> ≤ 15, -30 ≤ <i>k</i> ≤ 30, -27 ≤ <i>l</i> ≤ 27                                                            | -11 ≤ <i>h</i> ≤ 11, -17 ≤ <i>k</i> ≤ 17, -24 ≤ <i>l</i> ≤ 24                                                 |
| Independent reflections                                                                                  | 12926 [R(int) = 0.0205]                                                                                                | 8889 [R(int) = 0.0375]                                                                                        |
| GoF <sup>a</sup> on <i>F</i> <sup>2</sup>                                                                | 1.064                                                                                                                  | 0.993                                                                                                         |
| <i>R</i> <sub>1</sub> <sup>b</sup> , <i>wR</i> <sub>2</sub> <sup>c</sup><br>[ <i>I</i> > 2σ( <i>I</i> )] | 0.0631, 0.1880                                                                                                         | 0.0909, 0.2593                                                                                                |
| <i>R</i> <sub>1</sub> , <i>wR</i> <sub>2</sub> (all data)                                                | 0.0706, 0.1984                                                                                                         | 0.0994, 0.2681                                                                                                |

<sup>a</sup>GoF =  $\{\sum[w(F_o^2 - F_c^2)^2]/(n - p)\}^{1/2}$ , where *n* and *p* denote the number of data points and the number of parameters, respectively. <sup>b</sup>*R*<sub>1</sub> =  $(\sum||F_o| - |F_c||)/\sum|F_o|$ . <sup>c</sup>*wR*<sub>2</sub> =  $\{\sum[w(F_o^2 - F_c^2)^2]/\sum[w(F_o^2)^2]\}^{1/2}$ , where  $w = 1/[\sigma^2(F_o^2) + (aP)^2 + (bP)]$  and  $P = [\max(0, F_o^2) + 2F_c^2]/3$ .

Figure 4. Numbered crystal diagram for metalla-rectangle **1**(left) and **2**(right). Color codes: yellow = Ru, green = C, blue = N, red = O.

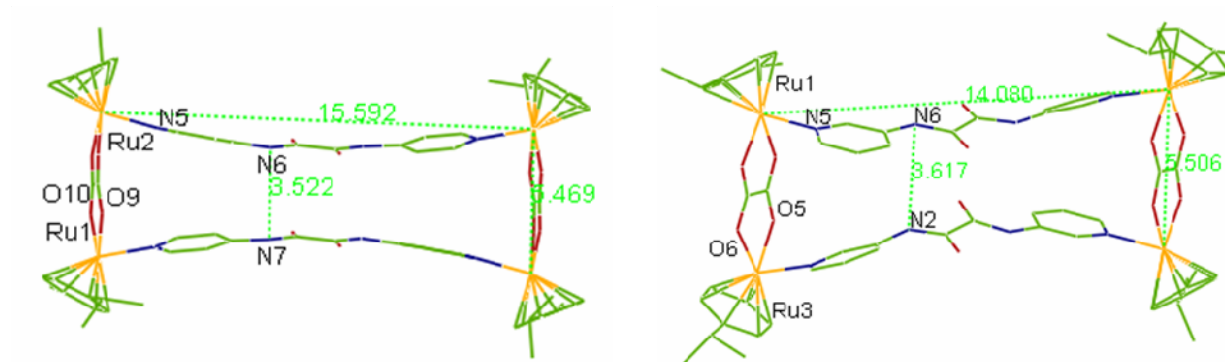

Table S2. Important Bond Lengths (Å) and Angles (°) for the metalla-rectangles **1** and **2**.

| <b>1</b>         |          |                 |          |
|------------------|----------|-----------------|----------|
| Ru(1)-O(9)       | 2.10(4)  | Ru(2)-N(5)      | 2.11(5)  |
| Ru(1)-O(10)      | 2.10(4)  |                 |          |
| O(9)-Ru(1)-O(10) | 78.7(16) | O(8)-Ru(1)-N(5) | 84.1(18) |
| <b>2</b>         |          |                 |          |
| Ru(3)-O(5)       | 2.10(8)  | Ru(1)-N(5)      | 2.10(9)  |
| Ru(3)-O(6)       | 2.13(8)  |                 |          |
| O(5)-Ru(3)-O(6)  | 79.0(3)  | O(7)-Ru(1)-N(5) | 83.2(3)  |



Table S3. Hydrogen bonds for **1** [ $\text{\AA}$  and  $^\circ$ ].

| D-H...A              | d(D-H) | d(H...A) | d(D...A) | $\angle(\text{DHA})$ |
|----------------------|--------|----------|----------|----------------------|
| N(2)-H(2A)...O(3S)   | 0.88   | 2.04     | 2.872(7) | 156.9                |
| N(3)-H(3A)...O(2S)#2 | 0.88   | 2.25     | 3.083(7) | 157.6                |
| N(6)-H(6A)...O(7S)   | 0.88   | 2.19     | 3.032(7) | 159.0                |
| N(7)-H(7A)...O(9S)#1 | 0.88   | 2.11     | 2.905(7) | 149.9                |

Symmetry transformations used to generate equivalent atoms: #1  $-x+1, -y, -z+2$  #2  $-x+2, -y, -z+2$
